# Supplementary material
Source: MDPI journal article supplement (https://www.mdpi.com/2036-7481/12/3/42)
Supplement: s1 [file s1]

**Table S1.** Fungal species isolated in adult CF patients with rare CFTR mutations in Qatar.

| Isolated Fungus      | Number of Colonized Patients (%) |
|----------------------|----------------------------------|
| <i>Candida</i>       | 18 (81.9)                        |
| <i>Albicans</i>      | 8 (44.4)                         |
| <i>Dubliniensis</i>  | 10 (55.6)                        |
| <i>Tropicalis</i>    | 2 (11.1)                         |
| <i>Parapsilosis</i>  | 1 (5.5)                          |
| Others               | 5 (27.8)                         |
| <i>Aspergillus</i>   | 10 (45.5)                        |
| <i>Fumigatus</i>     | 5 (50.0)                         |
| <i>Niger</i>         | 2 (20.0)                         |
| Other                | 4 (40.0)                         |
| Other Fungal species | 2 (9.0)                          |
| Total                | 22 (70.9)                        |

**Table S2.** Lung function against frequency of colonizing fungal species in adult CF patients in Qatar.

| Number of Colonizing Fungal Species | Number of Infected Patients | ppFEV1 (%) | ppFVC (%) | Number of exacerbations |
|-------------------------------------|-----------------------------|------------|-----------|-------------------------|
| 0                                   | 9                           | 76         | 75        | 7                       |
| 1                                   | 10                          | 71         | 76        | 7                       |
| 2                                   | 8                           | 74         | 77.5      | 4                       |
| 3                                   | 3                           | 63         | 45        | 7                       |
| 4                                   | 1                           | 71         | 76        | 0                       |

**Table S3.** Lung function against colonizing fungal species in adult CF patients in Qatar.

|                     |            | Lung Function      |         |                  |         |                |         |
|---------------------|------------|--------------------|---------|------------------|---------|----------------|---------|
| Fungal Colonization | Culture    | ppFEV <sub>1</sub> | p-Value | ppFVC            | p-Value | Exacerbations  | p-Value |
| Fungal species      | P*<br>(22) | 71.0 (78.0–63.0)   | 0.5     | 76.0 (81.5–66.5) | 0.57    | 5.5 (0.0–11.0) | 0.856   |
|                     | A**<br>(9) | 76.0 (86.0–62.0)   | 00      | 75.0 (86.0–71.0) | 0       | 7.0 (3.0–8.0)  |         |
| <i>Candida</i>      | P<br>(18)  | 71.0 (78.0–63.0)   | 0.6     | 73.0 (81.5–61.5) | 0.18    | 5.5 (0.0–11.0) | 0.976   |
|                     | A<br>(13)  | 71.0 (81.0–63.0)   | 01      | 79.0 (86.0–74.0) | 0       | 7.0 (1.0–9.0)  |         |
| <i>Albicans</i>     | P<br>(8)   | 74.0 (82.5–49.0)   | 0.9     | 77.5 (87.5–51.5) | 0.85    | 5.5 (0.5–11.5) | 1.000   |
|                     | A<br>(23)  | 71.0 (81.0–63.0)   | 74      | 75.0 (84.0–71.0) | 8       | 7.0 (0.0–9.0)  |         |
| <i>Dubliniensis</i> | P<br>(10)  | 72.0 (81.0–67.0)   | 0.6     | 76.5 (83.5–70.0) | 0.89    | 8.0 (3.0–11.0) | 0.393   |
|                     | A<br>(21)  | 71.0 (80.0–62.0)   | 850     | 76.0 (86.0–69.0) | 54      | 6.0 (0.0–9.0)  |         |
| <i>Tropicalis</i>   | P<br>(2)   | 52.5 (63.0–42.0)   | 0.1     | 54.0 (54.0–54.0) | 0.27    | 3.5 (0.0–7.0)  | 0.520   |
|                     | A<br>(29)  | 71.0 (81.0–67.0)   | 12      | 76.0 (85.0–70.0) | 6       | 7.0 (1.0–10.0) |         |

|                                  |      |                  |     |                  |      |                |       |
|----------------------------------|------|------------------|-----|------------------|------|----------------|-------|
| <i>Parapsilosis</i>              | P    | 46.0 (46.0–46.0) | 0.2 | 45.0 (45.0–45.0) | 0.20 | 6.0 (6.0–6.0)  | 0.968 |
|                                  | A    | 71.0 (81.0–63.0) | 58  | 76.0 (85.0–70.0) | 7    | 7.0 (0.0–10.0) |       |
|                                  | (30) |                  |     |                  |      |                |       |
| Other <i>Candida</i> species     | P    | 71.0 (72.0–68.0) | 0.9 | 73.0 (76.0–72.0) | 0.58 | 3.0 (0.0–5.0)  | 0.390 |
|                                  | A    | 71.0 (81.0–62.0) | 06  | 77.5 (86.0–68.5) | 4    | 7.0 (1.0–10.0) |       |
|                                  | (26) |                  |     |                  |      |                |       |
| <i>Aspergillus</i>               | P    | 70.5 (71.0–63.0) | 0.2 | 77.5 (79.5–67.0) | 0.97 | 6.5 (0.0–10.0) | 0.973 |
|                                  | A    | 73.0 (82.0–67.0) | 28  | 74.0 (86.0–69.0) | 2    | 7.0 (1.0–9.0)  |       |
|                                  | (21) |                  |     |                  |      |                |       |
| <i>Fumigatus</i>                 | P    | 71.0 (77.0–70.0) | 0.9 | 79.0 (80.0–76.0) | 0.74 | 1.0 (0.0–6.0)  | 0.254 |
|                                  | A    | 71.0 (81.0–63.0) | 28  | 74.5 (85.0–68.5) | 7    | 7.0 (1.0–10.0) |       |
|                                  | (26) |                  |     |                  |      |                |       |
| <i>Niger</i>                     | P    | 61.5 (71.0–52.0) | 0.4 | 67.0 (76.0–58.0) | 0.46 | 1.0 (0.0–13.0) | 0.719 |
|                                  | A    | 71.0 (81.0–63.0) | 00  | 76.0 (86.0–69.0) | 3    | 7.0 (0.5–9.5)  |       |
|                                  | (29) |                  |     |                  |      |                |       |
| Other <i>Aspergillus</i> species | P    | 67.0 (71.0–63.0) | 0.3 | 77.5 (79.0–76.0) | 0.82 | 8.0 (4.0–12.5) | 0.363 |
|                                  | A    | 72.0 (81.0–62.0) | 68  | 75.0 (86.0–68.0) | 3    | 6.0 (0.0–10.0) |       |
|                                  | (27) |                  |     |                  |      |                |       |
| Other species                    | P    | 71.0 (71.0–71.0) | 0.9 | 76.0 (76.0–76.0) | 1.00 | 4.5 (0.0–9.0)  | 0.714 |
|                                  | A    | 71.0 (81.0–63.0) | 60  | 75.5 (85.0–68.5) | 0    | 7.0 (1.0–10.0) |       |
|                                  | (29) |                  |     |                  |      |                |       |

\* P stands for present

\*\*A stands for absent.

**Table S4.** Patients with particularly low lung function in the CF population in Qatar, in order of mention.

| Patient ID | Nationality | Genetics                                      | Age | BMI  | ppFE V1 (%) | ppFVC (%) | Exacerbations | Colonizing Fungal Species                                             | Asthma | Pancreatic Insufficiency |
|------------|-------------|-----------------------------------------------|-----|------|-------------|-----------|---------------|-----------------------------------------------------------------------|--------|--------------------------|
| 1          | non-Qatari  | Heterozygous R553X (c.1657C>T and c.1115A>T)) | 23  | 17.0 | 19          | 43        | 1             | <i>C. albicans</i>                                                    | Yes    | Yes                      |
| 2          | Qatari      | Heterozygous R553X (c.1657C>T and c.1115A>T)) | 28  | 25.4 | 46          | 45        | 6             | <i>C. albicans</i> ,<br><i>C. parapsilosis</i><br><i>A. fumigatus</i> | No     | Yes                      |
| 3          | Qatari      | I1234V                                        | 26  | 22.1 | 42          | 54        | 0             | <i>C. dubliniensis</i><br><i>C. tropicalis</i>                        | No     | Yes                      |
| 4          | Qatar       | Homozygous (S307N(c.920G>A))                  | 19  | 19.3 | 71          | 69        | 0             | None                                                                  | No     | No                       |
| 5          | Qatari      | Homozygous (S307N(c.920G>A))                  | 22  | 26.5 | 82          | 84        | 3             | <i>C. dubliniensis</i><br>other <i>C. sp.</i>                         | Yes    | Yes                      |

|   |        |                                 |        |          |    |    |   |      |    |    |
|---|--------|---------------------------------|--------|----------|----|----|---|------|----|----|
| 6 | Qatari | Homozygous<br>(S307N(c.920G>A)) | 2<br>0 | 32<br>.0 | 86 | 86 | 0 | None | No | No |
|---|--------|---------------------------------|--------|----------|----|----|---|------|----|----|
